# Supplementary material for: Reorganization energies and pre-exponential factors in the one-electron electrochemical and homogeneous oxidation of phenols coupled with an intramolecular amine-driven proton transfer
Source: Royal Society of Chemistry journal article supplement (doi:10.1039/c0cp00017e), 2010-01-01
Supplement: c0cp00017e.pdf [file c0cp00017e.pdf]

SUPPORTING INFORMATION

# Reorganization Energies and Pre-Exponential Factors in the One-Electron Electrochemical and Homogeneous Oxidation of Phenols Coupled with an Intramolecular Amine-Driven Proton Transfer.

Cyrille Costentin, Marc Robert and Jean-Michel Savéant

Contribution from the Laboratoire d'Electrochimie Moléculaire, Unité Mixte de Recherche Université - CNRS 7591, Université Paris Diderot, 15 rue Jean de Baïf, 75205 Paris Cedex 13, France.

## Effect of the proton donor-acceptor distance $Q$ vibration on $C$

The modeling of the barrier sketched in scheme S1 has been proposed.<sup>15</sup> It allows an estimation of  $C_0(Q)$  as a function of the barrier height,  $\Delta V$ , depending on the distance between the donor and acceptor atoms,  $Q$ .

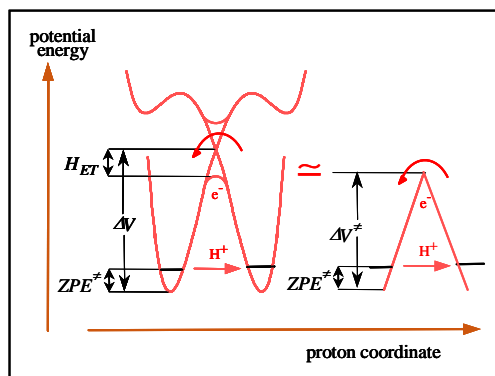

Modeling of tunneling barrier. The barrier is approximated by an isosceles triangle.

Scheme S1.

Within this model, the coupling constant is given by equations S1 and S2:

$$C_0(Q) = hv_0^\ddagger \exp \left[ -\frac{8\sqrt{2}}{3} \sqrt{\frac{hv_0^\ddagger}{\Delta V^\ddagger}} \left( \frac{\Delta V^\ddagger}{hv_0^\ddagger} - \frac{1}{2} \right)^{3/2} \right] \quad (\text{S1})$$

with:

$$\Delta V^\ddagger(Q) = \frac{f_0^\ddagger}{4} \left( \frac{Q - d_{\text{AH}}^0 - d_{\text{DH}}^0}{2} \right)^2 \quad (\text{S2})$$

where  $f_0^\ddagger = 4\pi^2\nu_0^\ddagger m_P$  is the force constant of the proton well and  $d_{\text{DH}}^0$  and  $d_{\text{AH}}^0$  are the proton equilibrium distances in the reactant and product, respectively.

Theoretical estimation of  $\int_0^\infty \ln \left( 1 + \frac{2\pi^2 C_0^2(Q)}{hv_n \sqrt{4\pi\lambda^{\text{het}} RT}} \right) P(Q) dQ$  may be done by taking into account the effect of the proton donor-acceptor distance  $Q$  vibration on the CPET coupling constant with equations S1 and S2. The contribution of each distance  $Q$  is weighting by the Boltzmann probability  $P(Q)$  that the donor and acceptor atoms be at a distance  $Q$  from one another:

$$P(Q) = \sqrt{\frac{f_Q}{2\pi RT}} \exp \left( -\frac{f_Q(Q - Q_{\text{eq}})^2}{2RT} \right) \text{ with } f_Q = 4\pi^2\nu_Q^2 m_Q \text{ where } \nu_Q \text{ is frequency and } m_Q \text{ is reduced mass.}$$

Calculation was performed with the following parameters:<sup>15</sup>

$$d_{\text{DH}}^0 = 0.96 \text{ \AA}$$

$$d_{\text{AH}}^0 = 1 \text{ \AA}$$

$$Q_{\text{eq}} = 2.7 \text{ \AA}$$

$$f_0^\ddagger = 4\pi^2\nu_0^\ddagger m_P = 21.6 \text{ eV \AA}^{-2}$$

$$hv_Q = 0.08 \text{ eV}$$

$$m_Q = 8 \text{ amu}$$

$$h\nu_n = \frac{k_B T}{h} = 6 \cdot 10^{12} \text{ s}^{-1}$$

$$\lambda^{het} = 1.4 \text{ eV}$$

An effective coupling constant  $C_0^{eff}$  is defined so that:

$$\ln \left( 1 + \frac{2\pi^2 (C_0^{eff})^2}{h\nu_n \sqrt{4\pi\lambda^{het} RT}} \right) = \int_0^\infty \ln \left( 1 + \frac{2\pi^2 C_0^2(Q)}{h\nu_n \sqrt{4\pi\lambda^{het} RT}} \right) P(Q) dQ$$

# References:

---

1S. C. Costentin, M. Robert and J. M. Saveant, *J. Am. Chem. Soc.*, 2007, **129**, 9953.
